# Supplementary material
Source: publisher figshare collection journal article supplement (https://acs.figshare.com/ndownloader/files/24309728)
Supplement: Supplementary file 1 [file 24309728]

## Supporting Information

### New Insights Into the Effect of Residue Mutations on the Rotavirus VP1 Function Using Molecular Dynamic Simulations

Nabil Abid<sup>1,2,\*</sup>, Daniele Pietrucci<sup>3</sup>, Marco Salemi<sup>4</sup> and Giovanni Chillemi<sup>5,6,\*</sup>

<sup>1</sup>Laboratory of Transmissible Diseases and Biological Active Substances LR99ES27, Faculty of Pharmacy, University of Monastir, Rue Ibn Sina, 5000, Monastir, Tunisia

<sup>2</sup>High Institute of Biotechnology of Sidi Thabet, Department of Biotechnology, University Manouba, BP-66, 2020, Ariana-Tunis, Tunisia; [nabil.abid@isbst.uma.tn](mailto:nabil.abid@isbst.uma.tn)

<sup>3</sup>Department of Biology, University of Rome Tor Vergata, Via della Ricerca Scientifica 1, 00133 Rome, Italy; [daniele.pietrucci@uniroma2.it](mailto:daniele.pietrucci@uniroma2.it)

<sup>4</sup>Department of Pathology, Immunology and Laboratory Medicine, University of Florida College of Medicine, Emerging Pathogens Institute, Gainesville, University of Florida, P.O. Box 100009, FL 32610-3633, USA; [salemi@pathology.ufl.edu](mailto:salemi@pathology.ufl.edu)

<sup>5</sup>Department for Innovation in Biological, Agro-food and Forest systems, DIBAF, University of Tuscia, via S. Camillo de Lellis s.n.c., 01100 Viterbo, Italy; [gchillemi@unitus.it](mailto:gchillemi@unitus.it)

<sup>6</sup>Institute of Biomembranes, Bioenergetics and Molecular Biotechnologies, IBIOM, CNR, Via Giovanni Amendola, 122/O, 70126, Bari, Italy

\*Corresponding Author

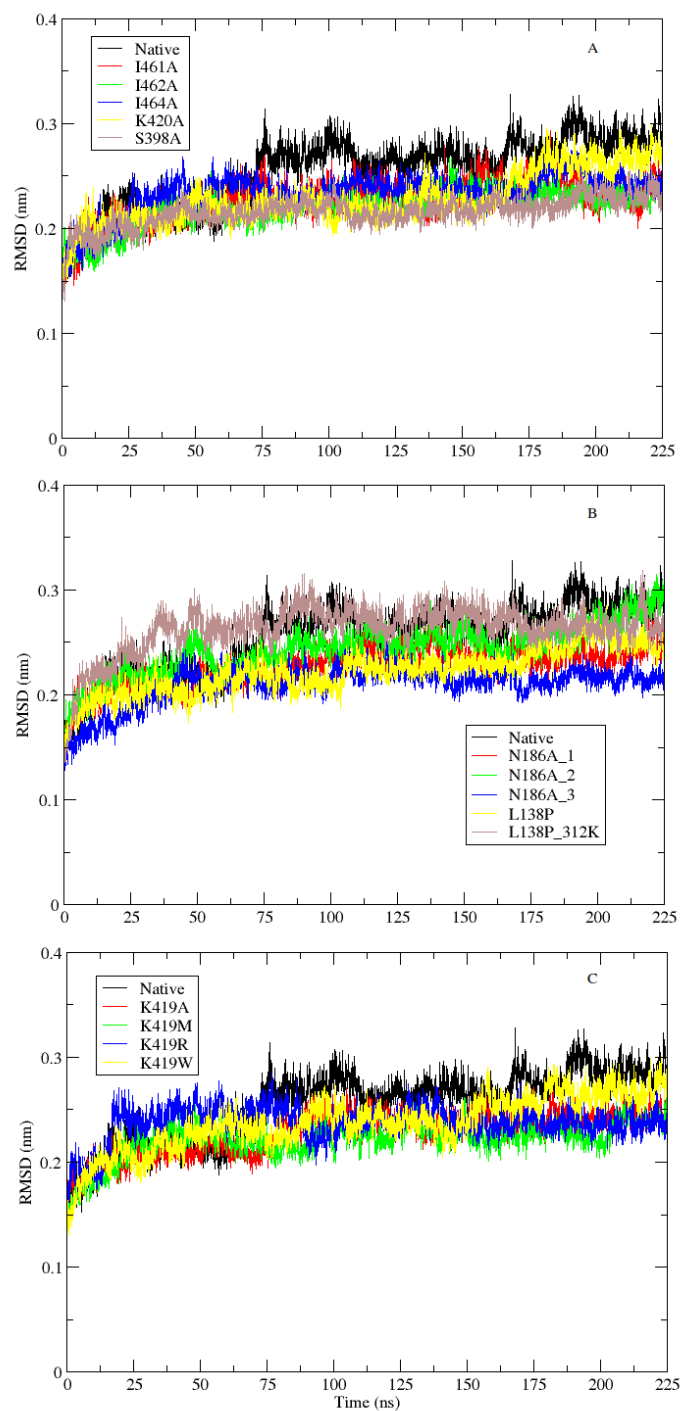

**Figure S1.**

Root Mean Square Deviation (RMSD) of amino acid residues of all mutants during 225 ns simulation run. (A) RMSD of mutations of hydrophobic residues of motif F (I461A, I462A, and I464A) and finger subdomain residues (S398A and K420A); (B) RMSD of a single (N186A\_1), multiple (N186A\_2 and N186A\_3), and temperature-sensitive (L138P) mutations; (C) RMSD of RNA entry bottleneck mutations (K419A, K419M, K419R, and K419W).

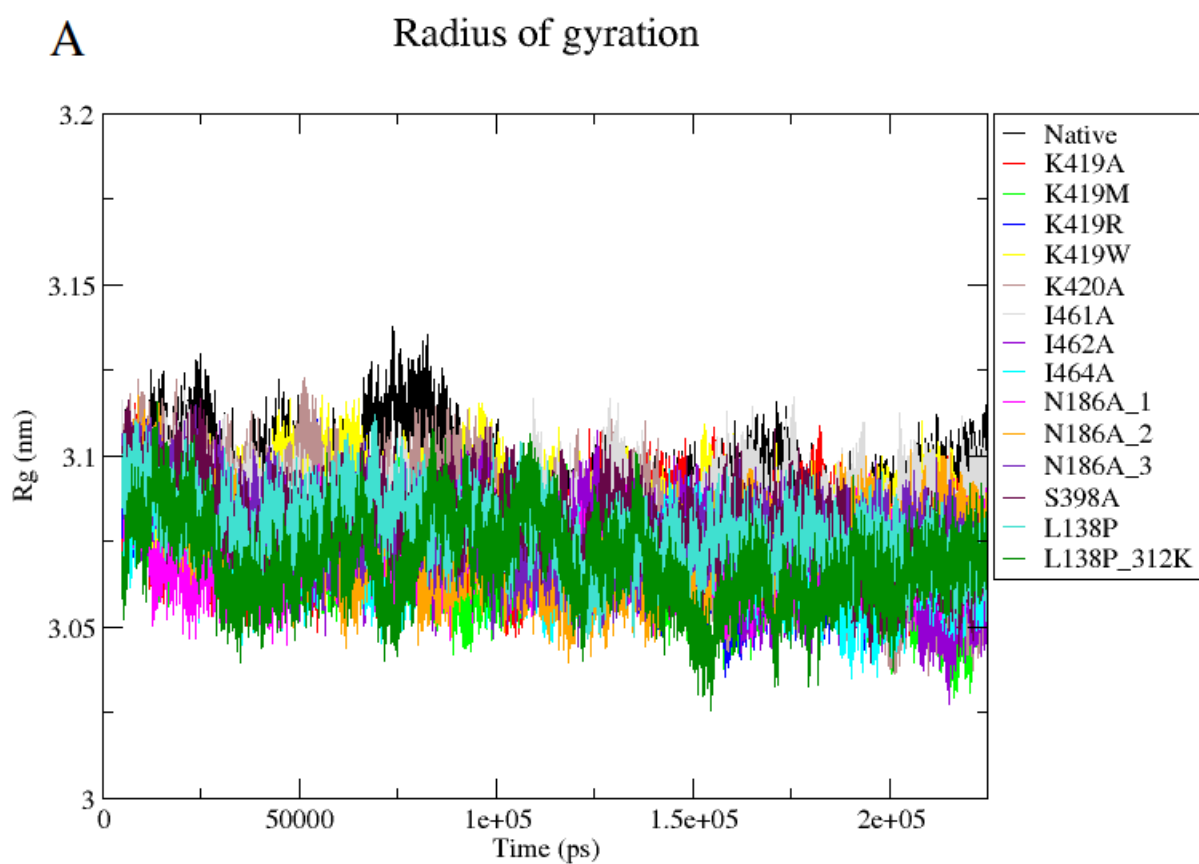

**Figure S2.** Radius of gyration (A) and solvent accessible surface analysis of the Native and the mutant structures. (B-F) during 225 ns simulation run. Structures are shown by different colors.

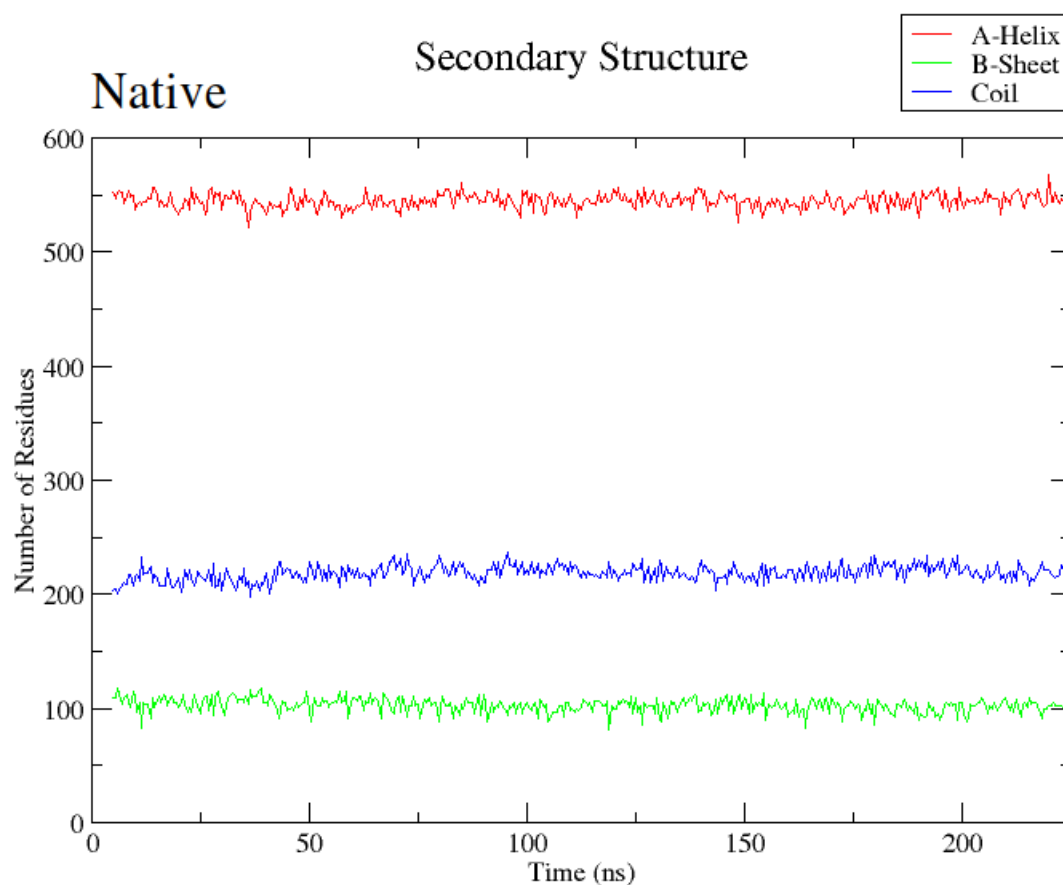

**Figure S3.** The secondary structure analysis of the Native and mutant structures during 225 ns simulation run. A-Helix, B-Sheet, and Coil structures are shown by different colors for all structures.

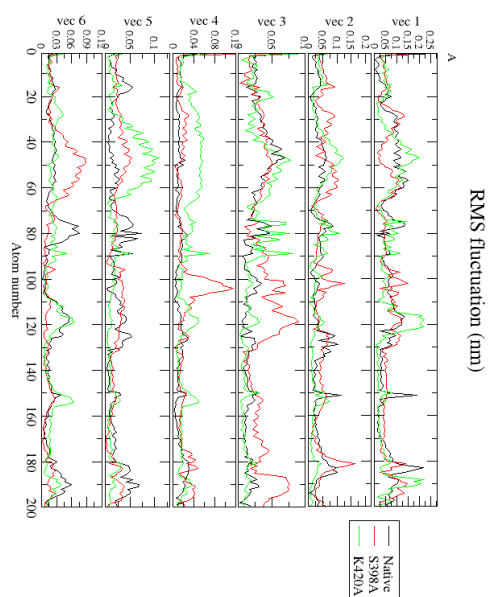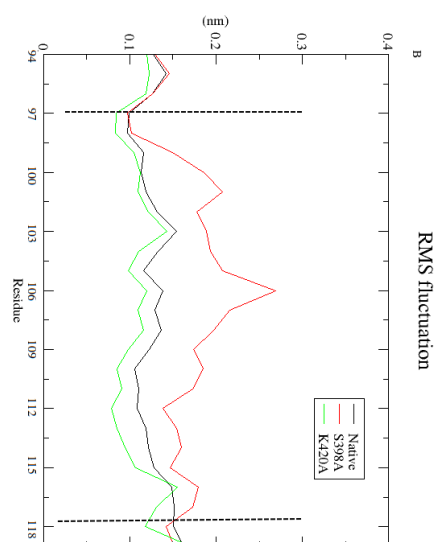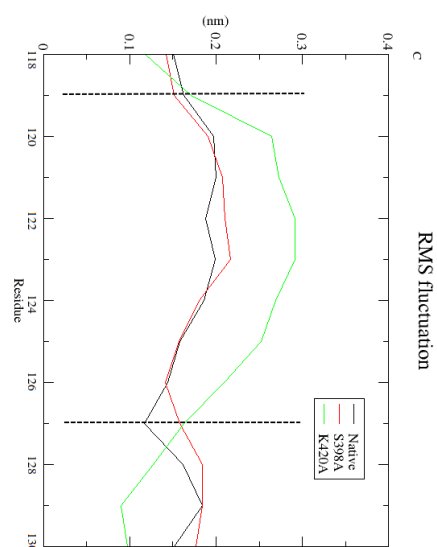

**Figure S4.**

Root mean square fluctuation (RMSF) values of C $\alpha$  atoms of the mutants at the N-terminal region (residues 1-200) of S398A and K420A mutants calculated during 225 ns simulation run along the first six eigenvectors (A). The most pronounced fluctuations at residues 97-117 for S398A (B) and 119-127 for K420A (C).

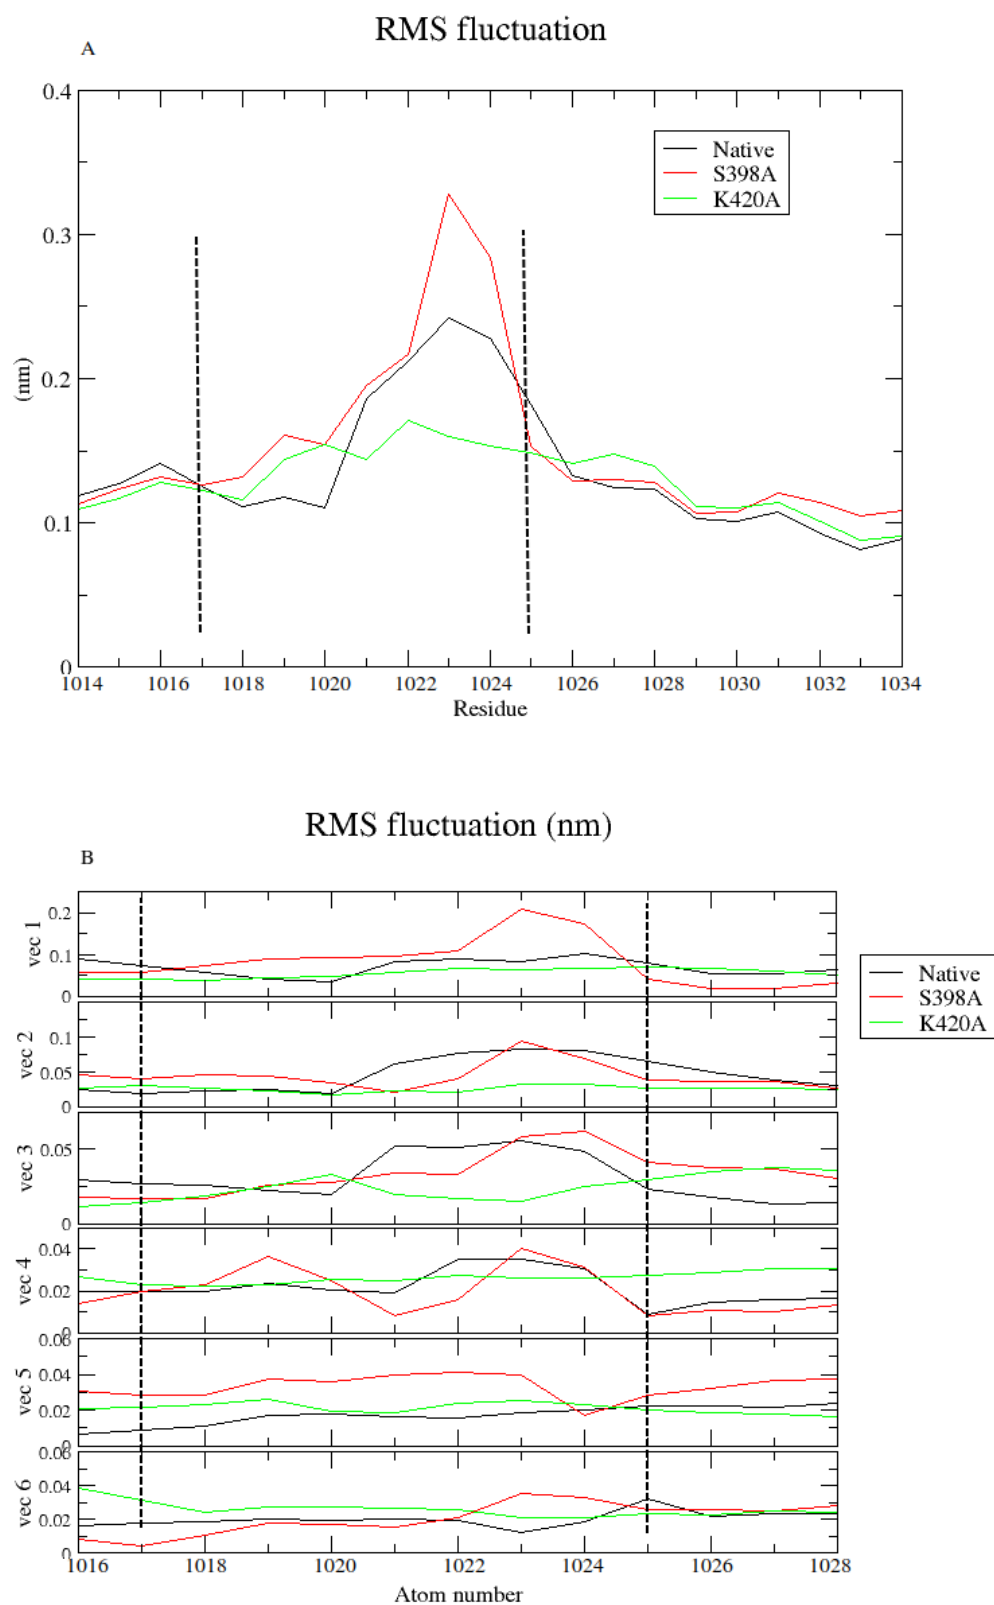

**Figure S5.**

Root mean square fluctuation (RMSF) values of C $\alpha$  atoms of the mutants at additional region (residues 1017-1025) for S398A calculated during 225 ns simulation run (A), yet supported by the PCA analysis along the first six eigenvectors (B).

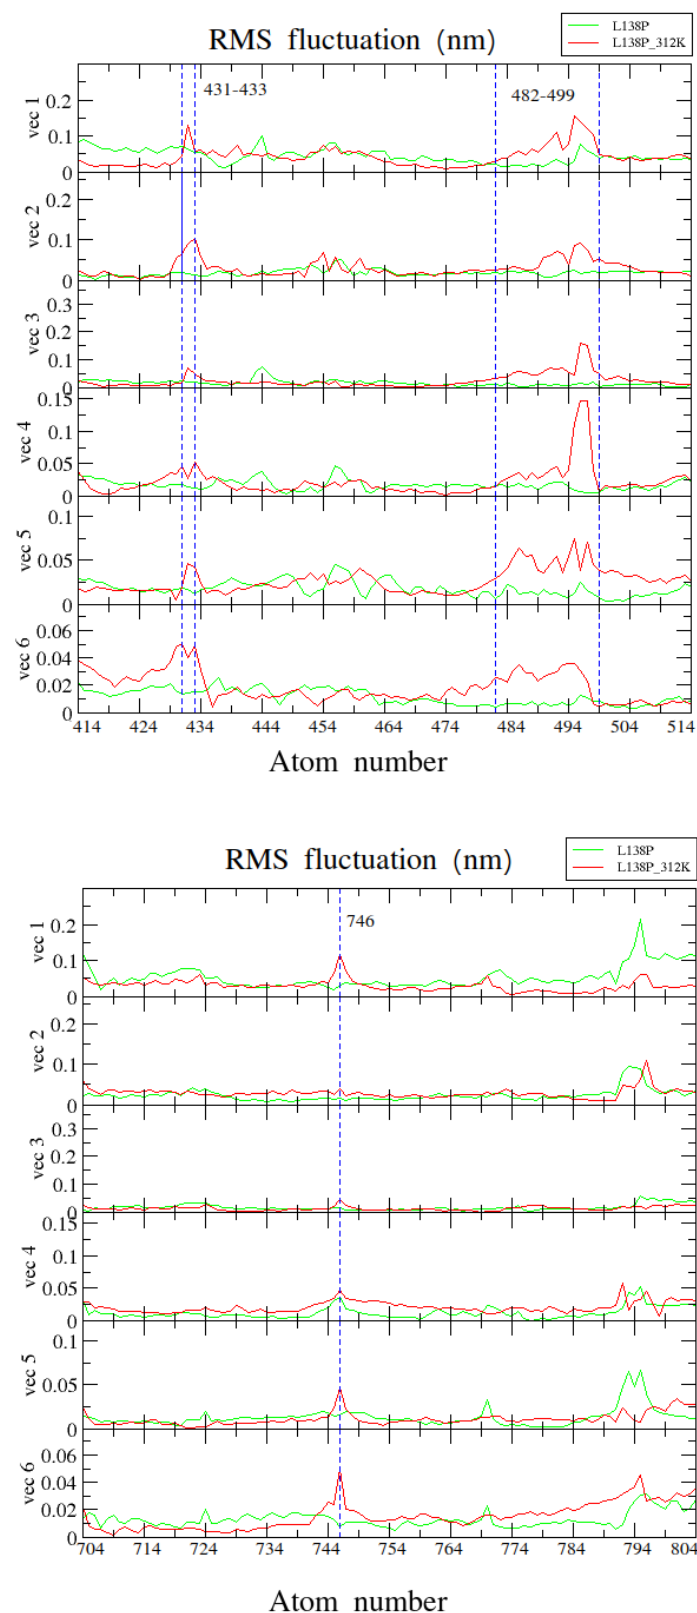

**Figure S6.**

Root mean square fluctuation (RMSF) values of C $\alpha$  atoms of the temperature-sensitive (ts) mutants of L138P calculated during 225 ns simulation run, showing fluctuation at residue ranges 431-433, 482-499, and around residue 746, compared to L138P<sub>300K</sub>.

A

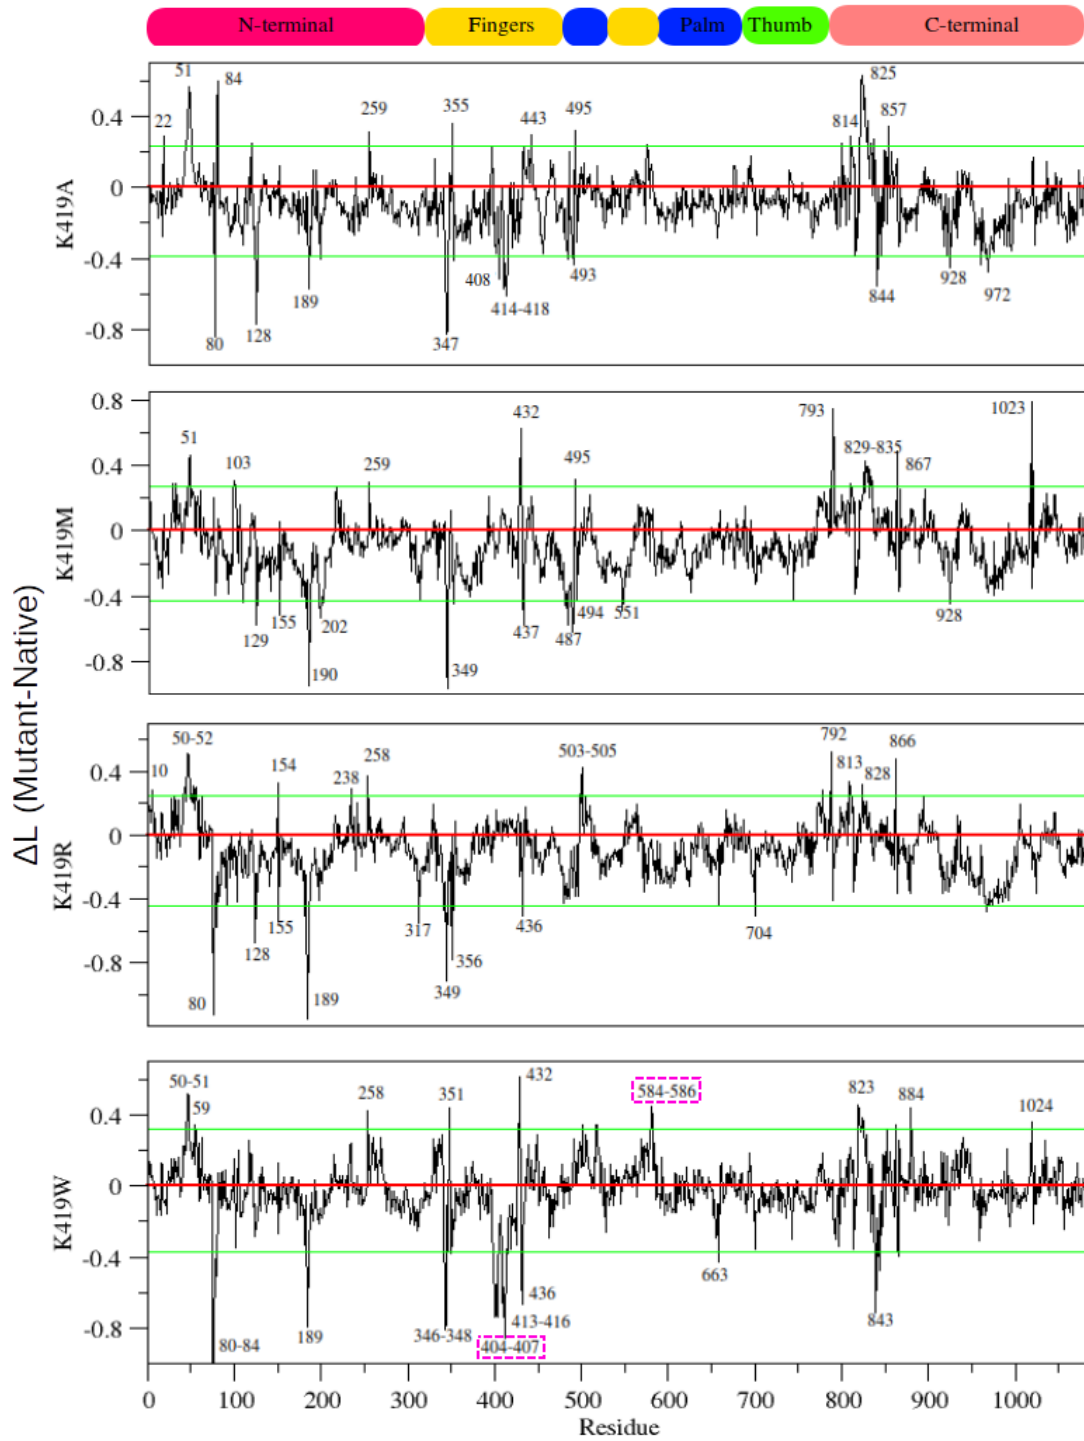

**Figure S7.** The measurement of reachability in VP1 protein. Change in reachability ( $\Delta L_i$ ) for the each protein mutant (A-E), compared to the Native structure.  $\Delta L$  decrease indicates that residues in mutants are moving closer to each other with respect to the Native and are more accessible; whereas  $\Delta L$  increase indicates that residues in mutants are moving further to each other with respect to the Native and are less accessible.



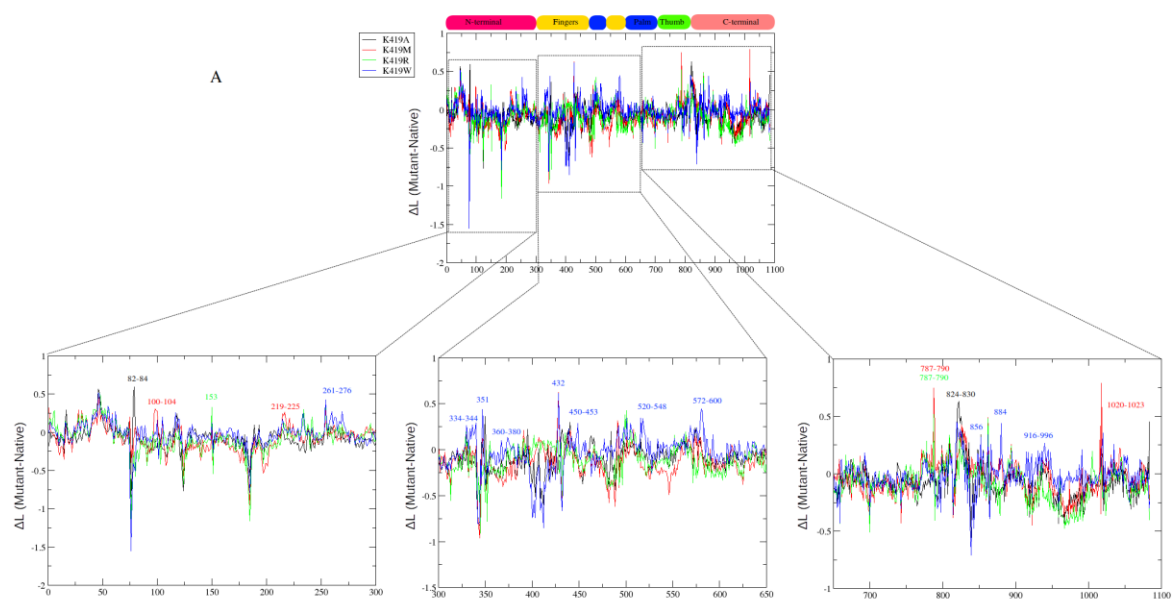

**Figure S8.** Multiple change in reachability ( $\Delta L_i$ ) analysis within protein structures. Regions recording high  $\Delta L_i$  are showing by different colors according to their corresponding structures.

A

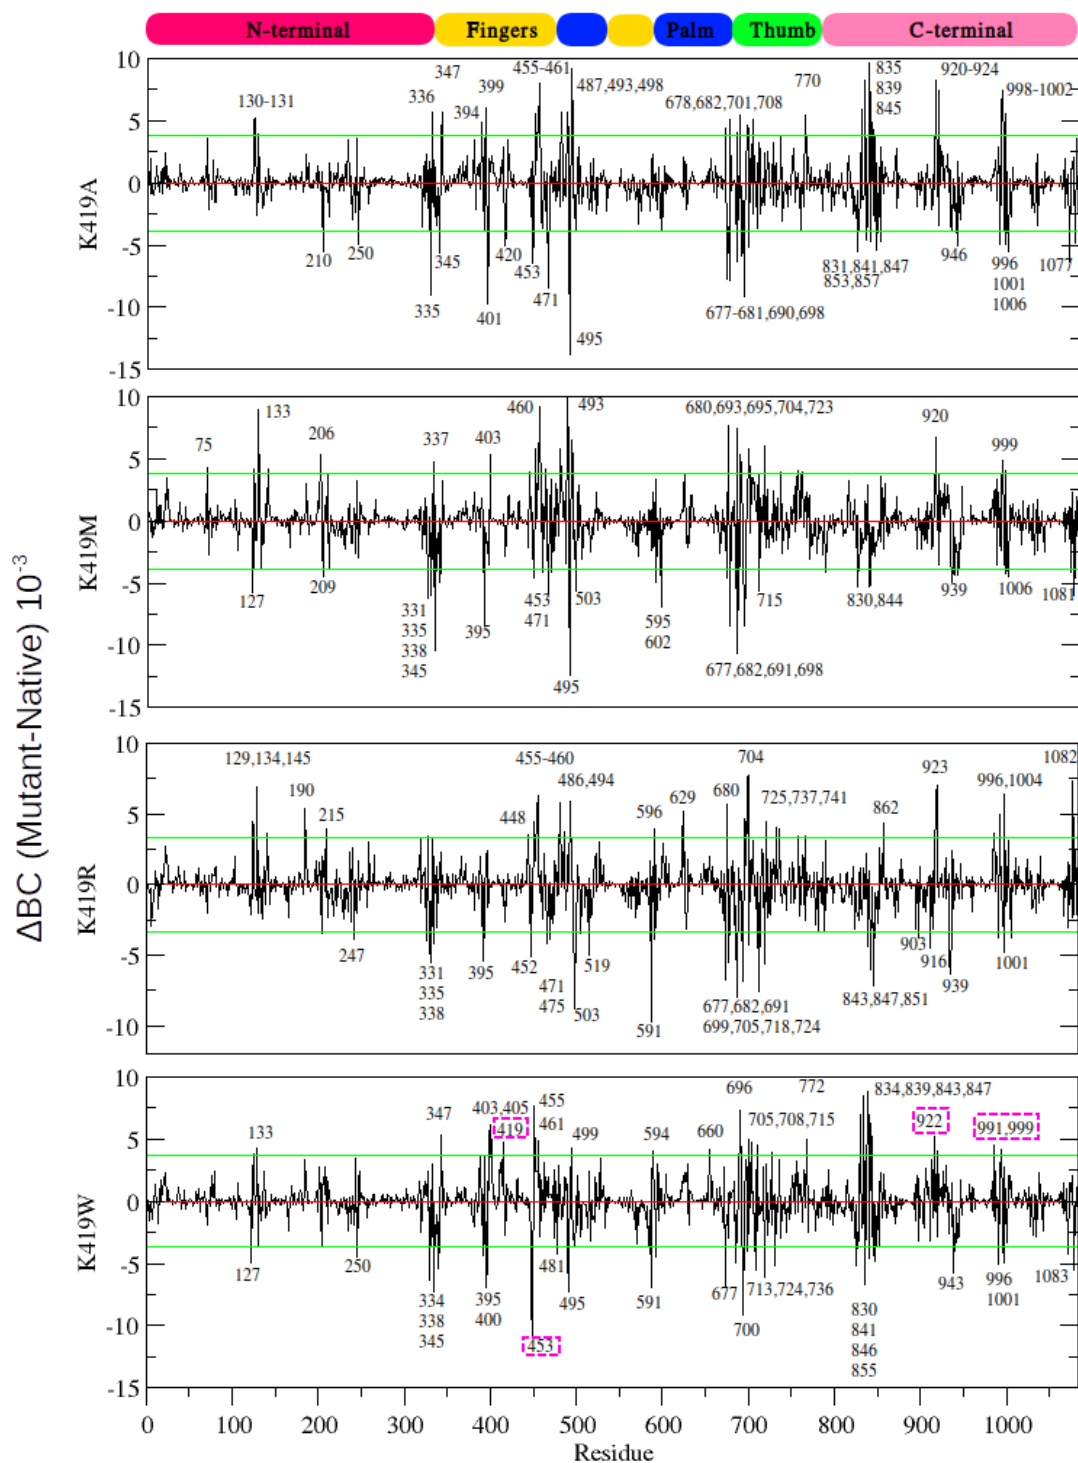

**Figure S9.** The measurement of betweenness centrality in VP1 protein. Change in betweenness centrality ( $\Delta BC$ ) profile for each protein mutant (A-E), compared to the native structure. Decrease to  $\Delta BC$  indicates a decrease in residue usage within the mutant whereas an increase to  $\Delta BC$  demonstrates increased residue usage.

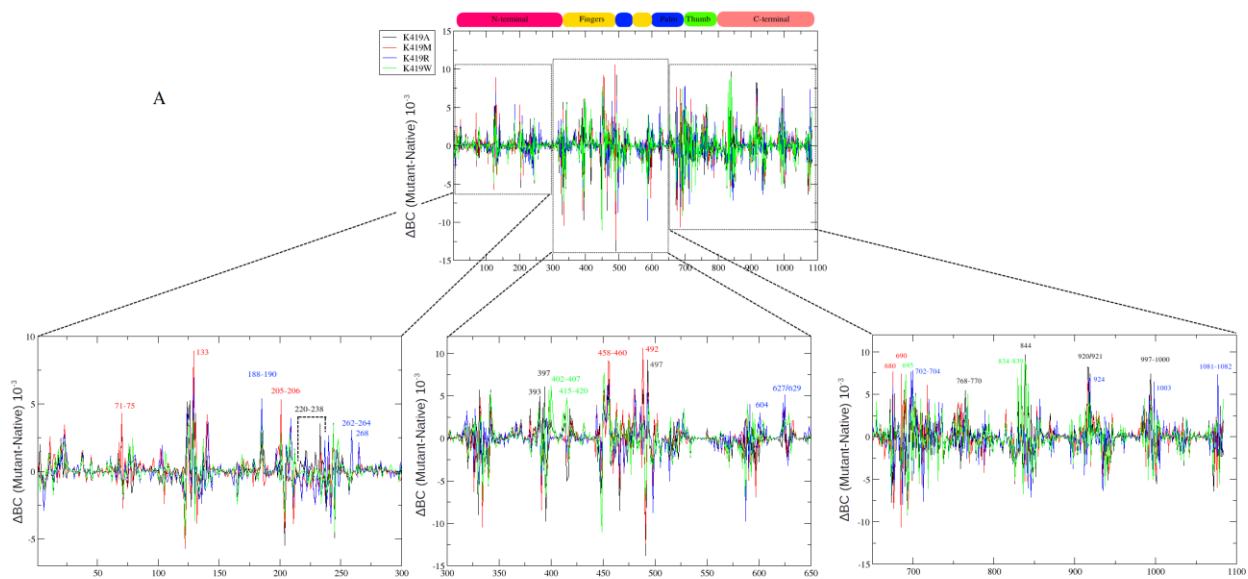

**Figure S10.** Change in betweenness centrality ( $\Delta BC$ ) profile analysis with protein structures. Regions recording high  $\Delta BC$  are shown by different colors according to their corresponding structures.

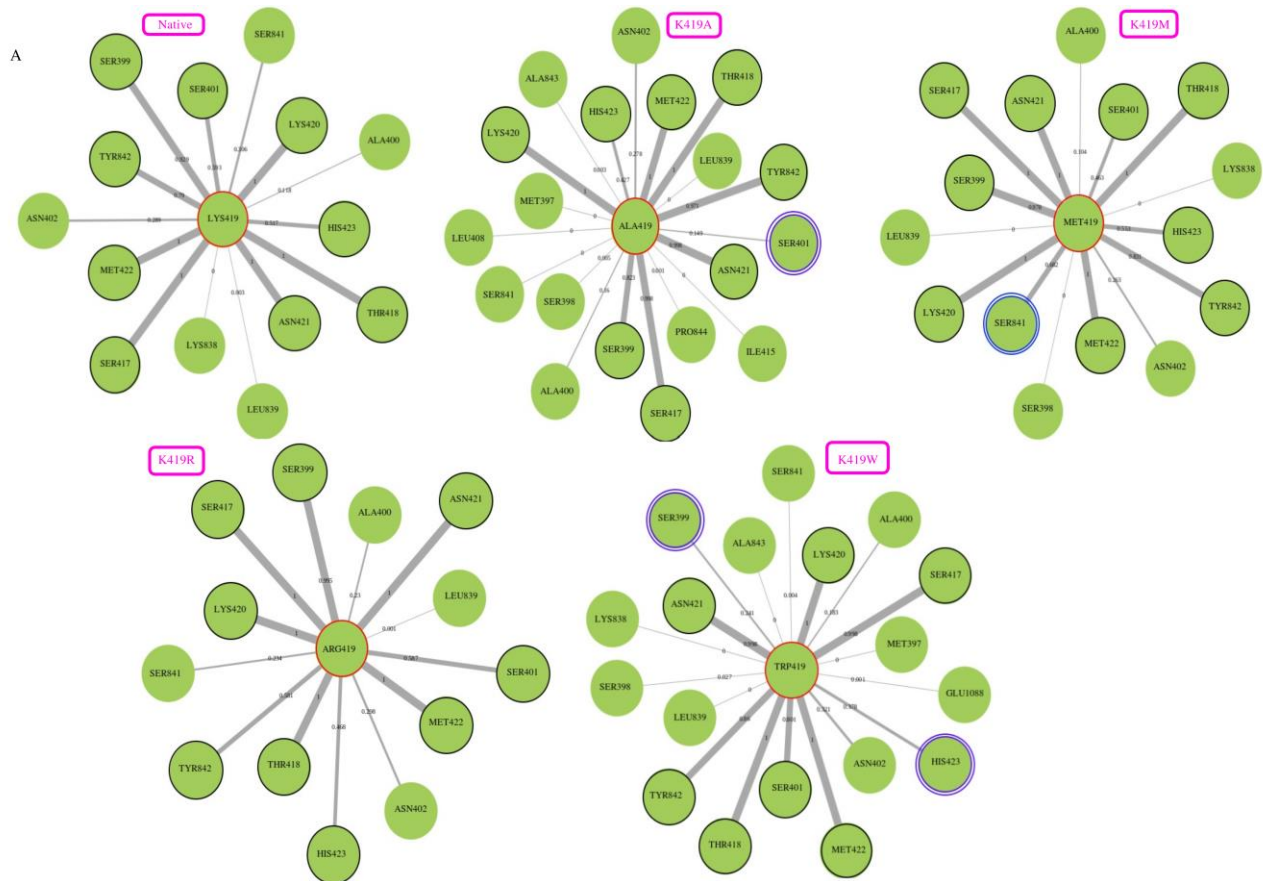

**Figure S11.** Residue contact maps of mutated residues, compared to the Native structure (A-G). Edges between the residue of interest and the other residues are weighted based on how often the interaction exists.

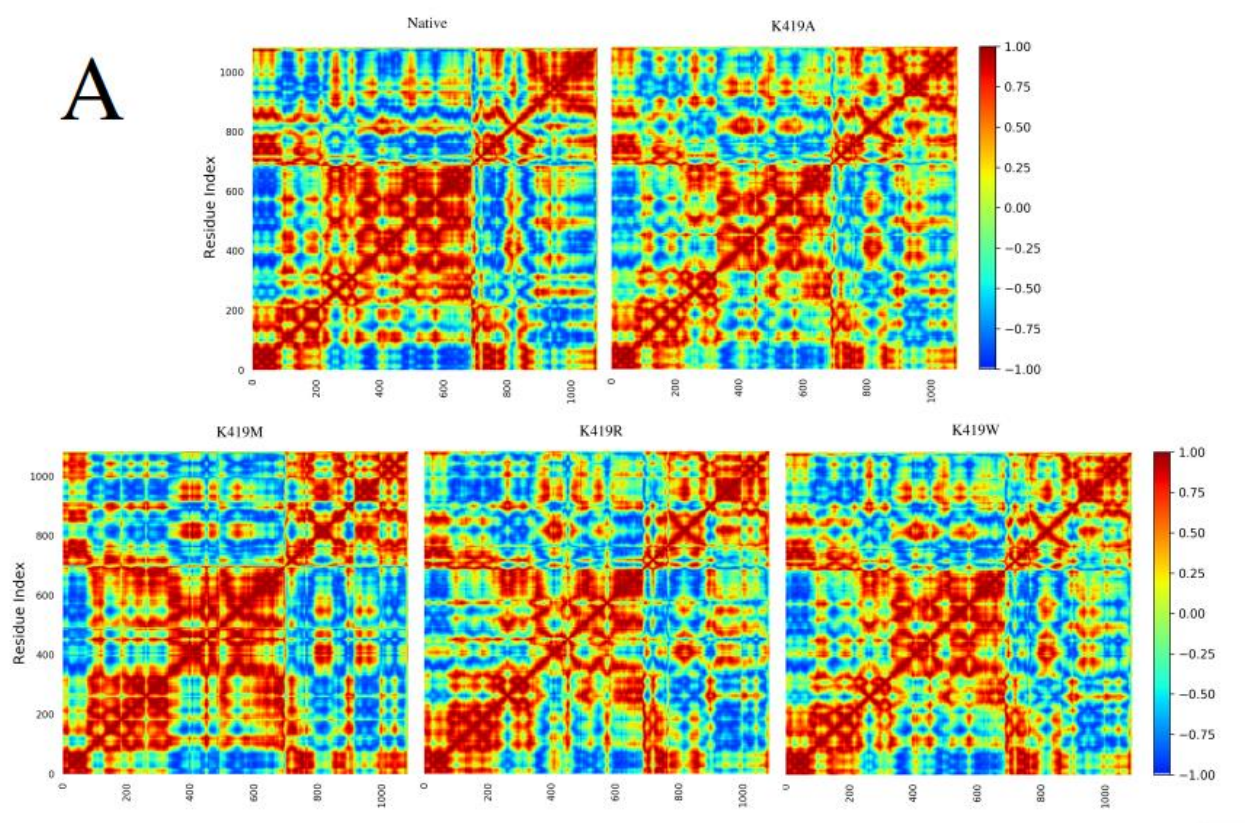

**Figure S12.** Dynamic cross-correlation profile of protein mutants. Matrices calculated as the difference in communication efficiency between protein residues (A-E). Warm colors (from yellow to red) indicate a relatively higher positive correlation, whereas the cold color (from cyan to blue) represents relatively highly anti-correlation.

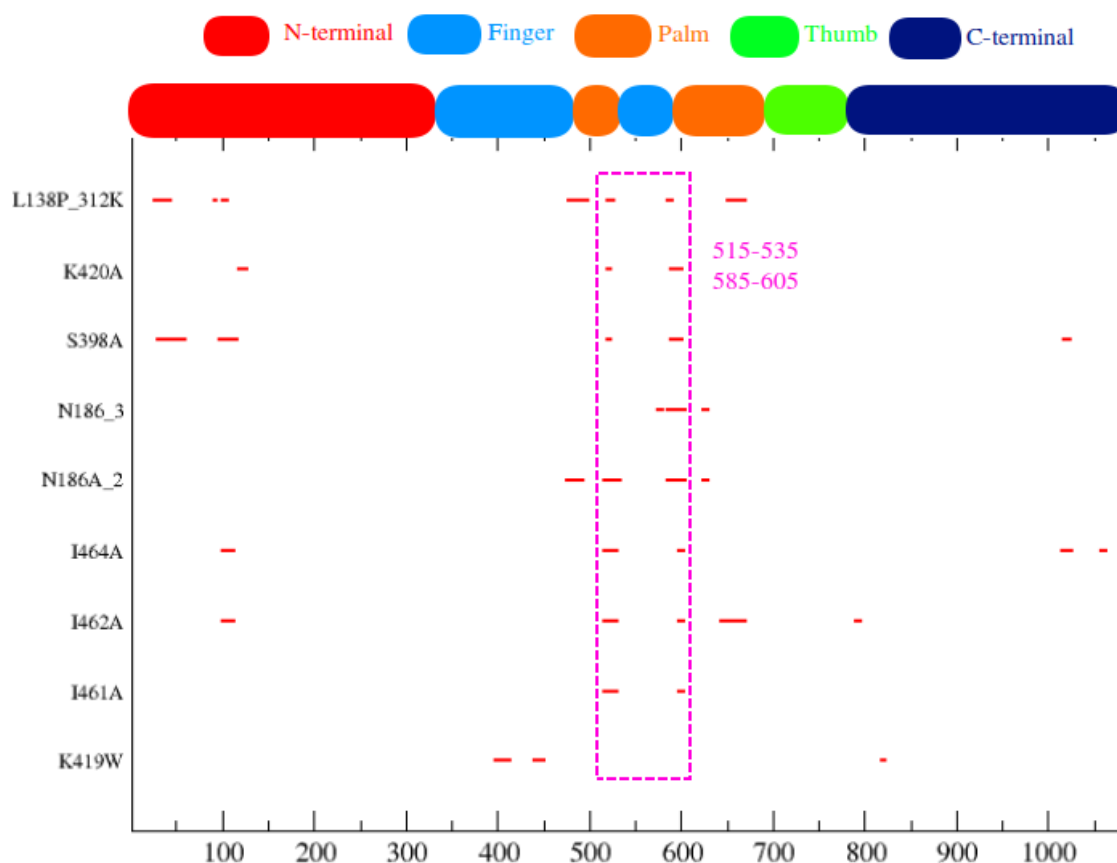

**Figure S13.** Difference in root mean square fluctuations ( $\Delta$ RMSF) of backbone atoms in protein mutants, compared to Native structure. The fluctuations of residues were shown by horizontal lines (red). The most pronounced fluctuations (aa 515-535 and aa 585-605) were shown by magenta colored box.

**Table S1.** The h-bond analysis of the K419A, K419M, K419R, and K419W mutants. Time occurrence of h-bond and atoms involved in interactions are shown. Differences are shown by different colors: (i) missing residues are shown by yellow; (ii) time occurrence of h-bond is shown by red; (iii) the unique residues for K419W mutant are shown by green.

|     |         |     |          |     |         |        |     |         |     |       |          |         |         |        |       |         |       |     |          |        |         |        |        |     |         |        |         |          |         |         |         |        |  |  |  |
|-----|---------|-----|----------|-----|---------|--------|-----|---------|-----|-------|----------|---------|---------|--------|-------|---------|-------|-----|----------|--------|---------|--------|--------|-----|---------|--------|---------|----------|---------|---------|---------|--------|--|--|--|
| LYS | 409 N   | LYS | 409 H    | ASP | 426 OD1 | 94.00% | LYS | 409 N   | LYS | 409 H | ASP      | 426 OD1 | 4.00%   | LYS    | 409 N | LYS     | 409 H | ASP | 426 OD1  | 0.70%  | LYS     |        | 409 N  | LYS | 409 H   | ASP    | 426 OD1 | 0.002%   |         |         |         |        |  |  |  |
| GLY | 411 N   | GLY | 411 H    | THR | 807 OG1 | 7.00%  | GLY | 411 N   | GLY | 411 H | THR      | 807 OG1 | 90.00%  | GLY    | 411 N | GLY     | 411 H | THR | 807 OG1  | 81.00% | GLY     |        | 411 N  | GLY | 411 H   | THR    | 807 OG1 | 16.40%   |         |         |         |        |  |  |  |
| ARG | 412 NH1 | ARG | 412 HH11 | GLY | 797 O   | 86.00% |     |         |     |       |          |         |         |        |       |         |       |     |          |        |         |        |        |     |         |        |         |          |         |         |         |        |  |  |  |
| ARG | 412 NH1 | ARG | 412 HH11 | ASP | 800 OD2 | 98.00% |     |         |     |       |          |         |         |        |       |         |       |     |          |        |         |        | ARG    |     | 412 NH1 | ARG    |         | 412 HH11 | ASP     |         | 800 OD2 | 50.00% |  |  |  |
| ARG | 412 NH2 | ARG | 412 HH21 | GLY | 737 O   | 95.00% |     |         |     |       |          |         |         |        |       |         |       |     |          |        |         |        |        |     |         |        |         |          |         |         |         |        |  |  |  |
| ARG | 412 N   | ARG | 412 H    | GLU | 801 OE2 | 0.004% | ARG | 412 N   |     | ARG   | 412 H    | GLU     | 801 OE2 | 91.00% | ARG   | 412 N   |       | ARG | 412 H    | GLU    | 801 OE2 | 0.002% | ARG    |     | 412 N   | ARG    |         | 412 H    | GLU     | 801 OE2 | 46.00%  |        |  |  |  |
| LYS | 413 NZ  | LYS | 413 HZ1  | GLU | 848 OE2 | 1.50%  |     |         |     |       |          |         |         |        |       |         |       |     |          |        |         |        | LYS    |     | 413 NZ  | LYS    |         | 413 HZ1  | GLU     | 848 OE2 | 83.00%  |        |  |  |  |
| LYS | 413 NZ  | LYS | 413 HZ1  | GLU | 801 OE1 | 0.05%  | LYS | 413 NZ  |     | LYS   | 413 HZ1  | GLU     | 801 OE1 | 10.00% | LYS   | 413 NZ  |       | LYS | 413 HZ1  | GLU    | 801 OE1 | 9.00%  | LYS    |     | 413 NZ  | LYS    |         | 413 HZ1  | GLU     | 801 OE1 | 88.00%  |        |  |  |  |
| SER | 417 N   | SER | 417 H    | ARG | 406 O   | 94.00% | SER | 417 N   |     | SER   | 417 H    | ARG     | 406 O   | 0.002% | SER   | 417 N   |       | SER | 417 H    | ARG    | 406 O   | 5.00%  | SER    |     | 417 N   | SER    |         | 417 H    | ARG     | 406 O   | 0.002%  |        |  |  |  |
| LYS | 420 N   | LYS | 420 H    | SER | 398 O   | 19.00% | LYS | 420 N   |     | LYS   | 420 H    | SER     | 398 O   | 17.00% | LYS   | 420 N   |       | LYS | 420 H    | SER    | 398 O   | 0.10%  | LYS    |     | 420 NZ  | LYS    |         | 420 HZ1  | SER     | 398 O   | 0.007%  |        |  |  |  |
| LYS | 420 N   | LYS | 420 H    | ALA | 400 O   | 19.00% | LYS | 420 N   |     | LYS   | 420 H    | ALA     | 400 O   | 0.005% | LYS   | 420 N   |       | LYS | 420 H    | ALA    | 400 O   | 0.03%  | LYS    |     | 420 N   | LYS    |         | 420 H    | ALA     | 400 O   | 0.30%   |        |  |  |  |
| LYS | 420 NZ  | LYS | 420 HZ1  | GLU | 404 OE2 | 27.00% |     |         |     |       |          |         |         |        |       |         |       |     |          |        |         |        |        |     |         |        |         |          |         |         |         |        |  |  |  |
| LYS | 420 NZ  | LYS | 420 HZ1  | ASN | 402 OD1 | 0.002% | LYS | 420 NZ  |     | LYS   | 420 HZ1  | ASN     | 402 OD1 | 1.00%  | LYS   | 420 NZ  |       | LYS | 420 HZ1  | ASN    | 402 OD1 | 76.00% | LYS    |     | 420 NZ  | LYS    |         | 420 HZ1  | ASN     | 402 OD1 | 0.015%  |        |  |  |  |
| ASN | 421 N   | ASN | 421 H    | SER | 398 O   | 9.00%  | ASN | 421 N   |     | ASN   | 421 H    | SER     | 398 O   | 0.004% | ASN   | 421 N   |       | ASN | 421 H    | SER    | 398 O   | 84.00% | ASN    |     | 421 N   | ASN    |         | 421 H    | SER     | 398 O   | 13.00%  |        |  |  |  |
| HIS | 423 NE2 | HIS | 423 HE2  | GLU | 404 OE1 | 75.00% | HIS | 423 NE2 |     | HIS   | 423 HE2  | GLU     | 404 OE1 | 0.005% | HIS   | 423 NE2 |       | HIS | 423 HE2  | GLU    | 404 OE1 | 0.14%  | HIS    |     | 423 NE2 | HIS    |         | 423 HE2  | GLU     | 404 OE2 | 0.009%  |        |  |  |  |
| ASN | 430 ND2 | ASN | 430 HD21 | LYS | 409 O   | 0.20%  | ASN | 430 ND2 |     | ASN   | 430 HD21 | LYS     | 409 O   | 4.50%  | ASN   | 430 ND2 |       | ASN | 430 HD21 | LYS    | 409 O   | 90.00% |        |     |         |        |         |          |         |         |         |        |  |  |  |
| LYS | 445 NZ  | LYS | 445 HZ1  | ASN | 402 O   | 89.00% | LYS | 445 NZ  |     | LYS   | 445 HZ1  | ASN     | 402 O   | 4.50%  | LYS   | 445 NZ  |       | LYS | 445 HZ1  | ASN    | 402 O   | 10.00% | LYS    |     | 445 NZ  | LYS    |         | 445 HZ1  | ASN     | 402 O   | 0.60%   |        |  |  |  |
|     |         |     |          |     |         |        |     |         |     |       |          |         |         |        |       |         |       |     |          |        | ARG     |        | 451 N  | ARG |         | 451 H  | GLU     |          | 404 OE1 | 62.00%  |         |        |  |  |  |
|     |         |     |          |     |         |        |     |         |     |       |          |         |         |        |       |         |       |     |          |        | ARG     |        | 452 NE | ARG |         | 452 HE | GLU     |          | 404 OE1 | 54.00%  |         |        |  |  |  |
| TYR | 467 N   | TYR | 467 H    | ASN | 402 OD1 | 18.00% | TYR | 467 N   |     | TYR   | 467 H    | ASN     | 402 OD1 | 0.004% | TYR   | 467 N   |       | TYR | 467 H    | ASN    | 402 OD1 | 4.60%  | TYR    |     | 467 N   | TYR    |         | 467 H    | ASN     | 402 OD1 | 0.002%  |        |  |  |  |
| LYS | 583 NZ  | LYS | 583 HZ1  | GLU | 404 OE1 | 0.005% | LYS | 583 NZ  |     | LYS   | 583 HZ1  | GLU     | 404 OE1 | 0.002% | LYS   | 583 NZ  |       | LYS | 583 HZ1  | GLU    | 404 OE1 | 0.15%  | LYS    |     | 583 NZ  | LYS    |         | 583 HZ1  | GLU     | 404 OE1 | 66.00%  |        |  |  |  |
| SER | 805 OG  | SER | 805 HG   | PHE | 410 O   | 84.00% | SER | 805 OG  |     | SER   | 805 HG   | PHE     | 410 O   | 30.00% | SER   | 805 OG  |       | SER | 805 HG   | PHE    | 410 O   | 0.002% | SER    |     | 805 OG  | SER    |         | 805 HG   | PHE     | 410 O   | 0.07%   |        |  |  |  |
| THR | 807 OG1 | THR | 807 HG1  | PHE | 410 O   | 66.00% |     |         |     |       |          |         |         |        |       |         |       |     |          |        |         |        |        |     |         |        |         |          |         |         |         |        |  |  |  |

**Video S1.** Animated visualization of the mutated residues in the VP1 protein used in the present study.

**Video S2.** Animated visualization of the fluctuation of the residues 400-406 of the K419W mutant, compared to K419A, K419M, and K419R using extreme structure according to eigenvector v1. Shift distance between model 1 and model 10 of the extreme structure of K419W was shown.
